# Supplementary material
Source: Springer Nature journal article supplement (https://www.springermedizin.de/resource/supplementary/12879_2012_2154_MOESM5_ESM.pdf/9443816)

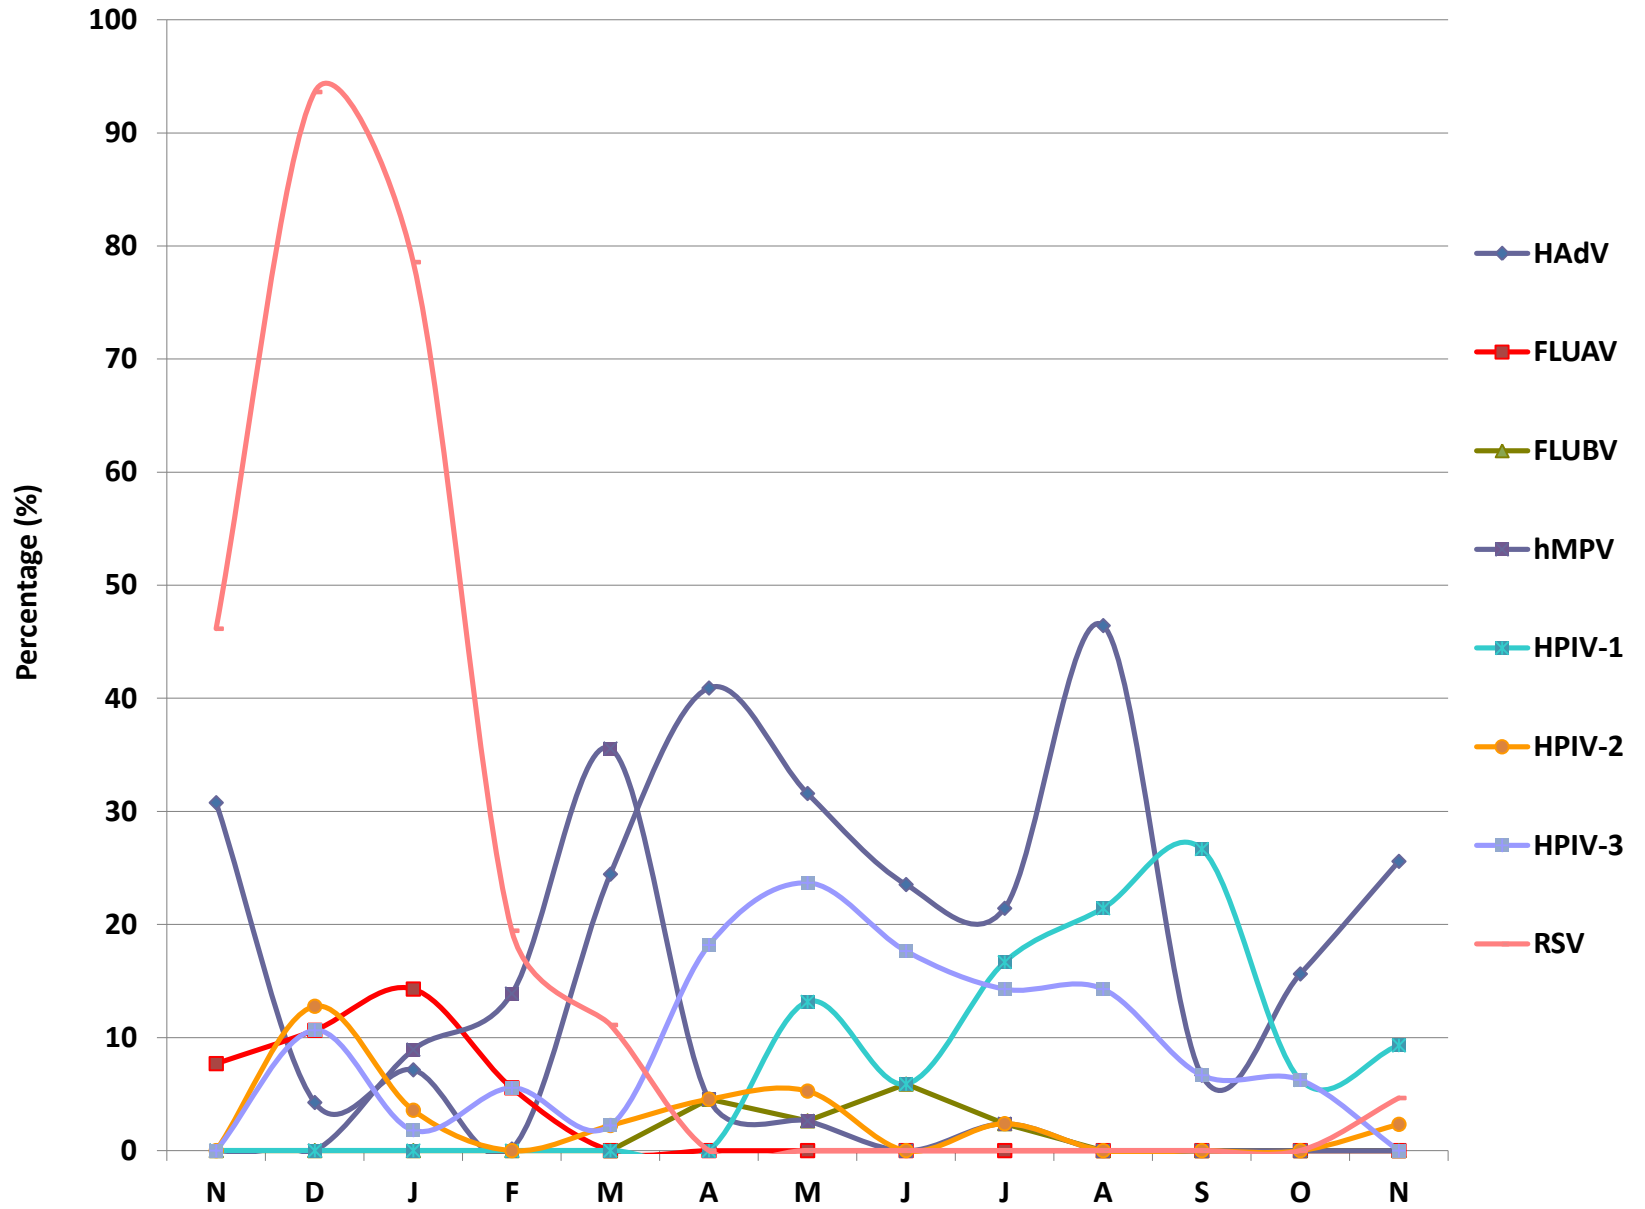

Supplement: MOESM5 [file 9443816]
